# Supplementary material for: Increased Expression of Circulating microRNA 101-3p in Type 1 Diabetes Patients: New Insights Into miRNA-Regulated Pathophysiological Pathways for Type 1 Diabetes
Source: PubMed Central journal article supplement (PMC6665278; doi:10.3389/fimmu.2019.01637), 2019-07-23
Supplement: Data_Sheet_3.pdf [file Data_Sheet_3.pdf]

**Supplement 3-** The experimentally validated molecules in signaling pathways of miR-101-3p**1-Genes of Hepatocyte Receptor Signaling Pathway**

| Symbol       | Location            | Family                  | Gene ID for Human |
|--------------|---------------------|-------------------------|-------------------|
| AKT          | Cytoplasm           | group                   |                   |
| AP-1         | Nucleus             | complex                 |                   |
| ATF2         | Nucleus             | transcription regulator | 1386              |
| c-FOS        | Nucleus             | transcription regulator | 2353              |
| c-JUN        | Nucleus             | transcription regulator | 3725              |
| c-RAF        | Cytoplasm           | kinase                  | 5894              |
| C3G          | Cytoplasm           | other                   | 2889              |
| CDC42        | Cytoplasm           | enzyme                  | 998               |
| CDK2         | Nucleus             | kinase                  | 1017              |
| COX2         | Cytoplasm           | enzyme                  | 5743              |
| CRKL         | Cytoplasm           | kinase                  | 1399              |
| CYCLIN D1    | Nucleus             | transcription regulator | 595               |
| DOCK1        | Cytoplasm           | other                   | 1793              |
| ELK-1        | Nucleus             | transcription regulator | 2002              |
| ERK1/2       | Cytoplasm           | group                   |                   |
| ETS          | Nucleus             | group                   |                   |
| ETS-ELK1     | Nucleus             | complex                 |                   |
| FAK          | Cytoplasm           | kinase                  | 5747              |
| GAB1         | Cytoplasm           | kinase                  | 2549              |
| GRB2         | Cytoplasm           | kinase                  | 2885              |
| HGF          | Extracellular Space | growth factor           | 3082              |
| IL-6         | Extracellular Space | cytokine                | 3569              |
| Integrin     | Plasma Membrane     | complex                 |                   |
| JNK          | Cytoplasm           | group                   |                   |
| MEK1/2       | Cytoplasm           | group                   |                   |
| MEKK         | Cytoplasm           | group                   |                   |
| MET          | Plasma Membrane     | kinase                  | 4233              |
| Met dimer    | Plasma Membrane     | complex                 |                   |
| MKK4/7       | Cytoplasm           | group                   |                   |
| p16INK4a     | Nucleus             | transcription regulator | 1029              |
| p21CIP1      | Nucleus             | kinase                  | 1026              |
| PAK1         | Cytoplasm           | kinase                  | 5058              |
| PI3K         | Cytoplasm           | complex                 |                   |
| PKC          | Cytoplasm           | group                   |                   |
| PLC $\gamma$ | Cytoplasm           | group                   |                   |
| PXN          | Cytoplasm           | other                   | 5829              |
| RAC1         | Plasma Membrane     | enzyme                  | 5879              |
| RAP1         | Cytoplasm           | group                   |                   |
| RAS          | Cytoplasm           | group                   |                   |
| SHP2         | Cytoplasm           | phosphatase             | 5781              |
| SOS          | Cytoplasm           | group                   |                   |
| STAT3        | Nucleus             | transcription regulator | 6774              |

Stat3 dimer                      Nucleus                      complex

**2- Genes of Ephrin Receptor Signaling Pathway**

| Symbol                     | Location            | Family                     | Gene ID for Human |
|----------------------------|---------------------|----------------------------|-------------------|
| ABI-1                      | Cytoplasm           | other                      | 10006             |
| ABL                        | Nucleus             | kinase                     | 25                |
| ADAM10                     | Plasma Membrane     | peptidase                  | 102               |
| AKT                        | Cytoplasm           | group                      |                   |
| ANGPT1                     | Extracellular Space | growth factor              | 284               |
| ARP2/3                     | Cytoplasm           | complex                    |                   |
| AXIN                       | Cytoplasm           | other                      | 8312              |
| c-RAF                      | Cytoplasm           | kinase                     | 5894              |
| C3G                        | Cytoplasm           | other                      | 2889              |
| CAP                        | Plasma Membrane     | other                      | 10580             |
| CAS                        | Plasma Membrane     | enzyme                     | 9564              |
| CDC42                      | Cytoplasm           | enzyme                     | 998               |
| CFL                        | Cytoplasm           | group                      |                   |
| CREB                       | Nucleus             | group                      |                   |
| CRK                        | Cytoplasm           | group                      |                   |
| CXCR4                      | Plasma Membrane     | G-protein coupled receptor | 7852              |
| EFNA                       | Plasma Membrane     | group                      |                   |
| Efna dimer                 | Plasma Membrane     | complex                    |                   |
| EFNB                       | Plasma Membrane     | group                      |                   |
| Efnb dimer                 | Plasma Membrane     | complex                    |                   |
| EGF                        | Extracellular Space | growth factor              | 1950              |
| EPHA                       | Plasma Membrane     | group                      |                   |
| Epha dimer                 | Plasma Membrane     | complex                    |                   |
| EPHB                       | Plasma Membrane     | group                      |                   |
| Ephb dimer                 | Plasma Membrane     | complex                    |                   |
| ERK1/2                     | Cytoplasm           | group                      |                   |
| FAK                        | Cytoplasm           | kinase                     | 5747              |
| FGF1                       | Extracellular Space | growth factor              | 2246              |
| FYN                        | Plasma Membrane     | kinase                     | 2534              |
| G alpha-G beta-GDP-G gamma | Cytoplasm           | complex                    |                   |
| G $\alpha$                 | Cytoplasm           | group                      |                   |
| G $\beta$                  | Cytoplasm           | group                      |                   |
| G $\gamma$                 | Cytoplasm           | group                      |                   |
| GRB2                       | Cytoplasm           | kinase                     | 2885              |
| GRB4                       | Cytoplasm           | kinase                     | 8440              |
| GRIN                       | Plasma Membrane     | complex                    |                   |
| Integrin                   | Plasma Membrane     | complex                    |                   |
| ITSN1                      | Cytoplasm           | other                      | 6453              |
| JAK2                       | Cytoplasm           | kinase                     | 3717              |
| KALRN                      | Cytoplasm           | kinase                     | 8997              |
| LIMK                       | Cytoplasm           | group                      |                   |
| LMW-PTP                    | Cytoplasm           | phosphatase                | 52                |

|               |                     |                         |       |
|---------------|---------------------|-------------------------|-------|
| MEK1/2        | Cytoplasm           | group                   |       |
| NCK           | Cytoplasm           | kinase                  | 4690  |
| Nck1-Nik      | Cytoplasm           | complex                 |       |
| NGEF          | Cytoplasm           | other                   | 25791 |
| NIK           | Cytoplasm           | group                   |       |
| p62DOK        | Plasma Membrane     | kinase                  | 1796  |
| PAK           | Cytoplasm           | group                   |       |
| PDGF          | Extracellular Space | complex                 |       |
| PI3K $\gamma$ | Cytoplasm           | group                   |       |
| PTP-BL        | Cytoplasm           | phosphatase             | 5783  |
| PXN           | Cytoplasm           | other                   | 5829  |
| RAC           | Cytoplasm           | group                   |       |
| RAP1          | Cytoplasm           | group                   |       |
| RAS           | Cytoplasm           | group                   |       |
| RAS GAP       | Cytoplasm           | transporter             | 5921  |
| RGS3          | Nucleus             | other                   | 5998  |
| RHOA          | Cytoplasm           | enzyme                  | 387   |
| ROCK          | Cytoplasm           | group                   |       |
| SDC2          | Plasma Membrane     | other                   | 6383  |
| SDCBP         | Plasma Membrane     | enzyme                  | 6386  |
| SDF-1         | Extracellular Space | cytokine                | 6387  |
| SHC           | Cytoplasm           | other                   | 6464  |
| SHEP1         | Cytoplasm           | other                   | 10044 |
| SHP2          | Cytoplasm           | phosphatase             | 5781  |
| SOS           | Cytoplasm           | group                   |       |
| SRC           | Cytoplasm           | kinase                  | 6714  |
| STAT3         | Nucleus             | transcription regulator | 6774  |
| VEGF          | Extracellular Space | group                   |       |
| VSM-RHOGEF    | Cytoplasm           | other                   | 22899 |
| WASP          | Cytoplasm           | group                   |       |

---

### 3-Genes of Axonal Guidance Signaling Pathway

| Symbol               | Location            | Family                     | Gene ID for Human |
|----------------------|---------------------|----------------------------|-------------------|
| ABL                  | Nucleus             | Kinase                     | 25                |
| ABLIM                | Cytoplasm           | Group                      |                   |
| ADAM10               | Plasma Membrane     | Peptidase                  | 102               |
| AKT                  | Cytoplasm           | Group                      |                   |
| ARHGEF11             | Cytoplasm           | Other                      | 9826              |
| ARHGEF12             | Cytoplasm           | Other                      | 23365             |
| ARHGEF6/7            | Cytoplasm           | Group                      |                   |
| ARP2/3               | Cytoplasm           | Complex                    |                   |
| Axonbranching        | Other               | Function                   |                   |
| Axondetachment       | Other               | Function                   |                   |
| Axondynamics         | Other               | Function                   |                   |
| Axonrepulsion        | Other               | Function                   |                   |
| Axon attraction      | Other               | Function                   |                   |
| Axon guidance        | Other               | Function                   |                   |
| Axon migration       | Other               | Function                   |                   |
| Axon outgrowth       | Other               | Function                   |                   |
| Axon repulsion       | Other               | Function                   |                   |
| Axon turningresponse | Other               | Function                   |                   |
| BAIAP2               | Plasma Membrane     | Kinase                     | 10458             |
| BDNF                 | Extracellular Space | growth factor              | 627               |
| BMP                  | Extracellular Space | Group                      |                   |
| BMP7                 | Extracellular Space | growth factor              | 655               |
| Bmp7-Gdf7            | Extracellular Space | Complex                    |                   |
| c-Raf                | Cytoplasm           | Kinase                     | 5894              |
| Calcineurin          | Cytoplasm           | Complex                    |                   |
| CAS                  | Plasma Membrane     | Enzyme                     | 9564              |
| CDC42                | Cytoplasm           | Enzyme                     | 998               |
| CDK5                 | Nucleus             | Kinase                     | 1020              |
| CFL                  | Cytoplasm           | Group                      |                   |
| COS2                 | Extracellular Space | Other                      | 374654            |
| CRAM                 | Cytoplasm           | Enzyme                     | 56896             |
| CRK                  | Cytoplasm           | Group                      |                   |
| CRMP2                | Cytoplasm           | Enzyme                     | 1808              |
| CRMP2-KLC1-Tubulin   | Cytoplasm           | Complex                    |                   |
| CXCR4                | Plasma Membrane     | G-protein coupled receptor | 7852              |
| DCC                  | Plasma Membrane     | transmembrane receptor     | 1630              |
| Dcc dimer            | Plasma Membrane     | Complex                    |                   |
| Dcc-Unc5             | Plasma Membrane     | Complex                    |                   |
| DOCK1                | Cytoplasm           | Other                      | 1793              |
| Dock1-Pak            | Cytoplasm           | Complex                    |                   |
| EFNA                 | Plasma Membrane     | Group                      |                   |

|                            |                     |                               |        |
|----------------------------|---------------------|-------------------------------|--------|
| Efna dimer                 | Plasma Membrane     | Complex                       |        |
| EFNB                       | Plasma Membrane     | Group                         |        |
| Efnb dimer                 | Plasma Membrane     | Complex                       |        |
| EGF                        | Extracellular Space | growth factor                 | 1950   |
| eIF4E                      | Cytoplasm           | translation regulator         | 1977   |
| EPHA/B                     | Plasma Membrane     | Group                         |        |
| EPHA                       | Plasma Membrane     | Group                         |        |
| Epha dimer                 | Plasma Membrane     | Complex                       |        |
| EphA/B dimer               | Plasma Membrane     | Complex                       |        |
| EPHB                       | Plasma Membrane     | Group                         |        |
| Ephb dimer                 | Plasma Membrane     | Complex                       |        |
| ERBB2                      | Plasma Membrane     | Kinase                        | 2064   |
| ERK1/2                     | Cytoplasm           | Group                         |        |
| FAK                        | Cytoplasm           | Kinase                        | 5747   |
| FARP2                      | Cytoplasm           | Other                         | 9855   |
| FES                        | Cytoplasm           | Kinase                        | 2242   |
| FU                         | Cytoplasm           | Kinase                        | 27148  |
| FYN                        | Plasma Membrane     | Kinase                        | 2534   |
| FZD                        | Plasma Membrane     | Group                         |        |
| G alpha-G beta-GDP-G gamma | Cytoplasm           | Complex                       |        |
| Gα                         | Cytoplasm           | Group                         |        |
| Gαi                        | Cytoplasm           | Group                         |        |
| Gβ                         | Cytoplasm           | Group                         |        |
| Gγ                         | Cytoplasm           | Group                         |        |
| GDF7                       | Extracellular Space | growth factor                 | 151449 |
| GDP                        | Other               | chemical-endogenous mammalian |        |
| GIT1                       | Nucleus             | Kinase                        | 28964  |
| GLI                        | Cytoplasm           | Group                         |        |
| Gli-Kif7-Stk36-Sufu        | Cytoplasm           | Complex                       |        |
| GRB2                       | Cytoplasm           | Kinase                        | 2885   |
| GRB4                       | Cytoplasm           | Kinase                        | 8440   |
| GSK3β                      | Nucleus             | Kinase                        | 2932   |
| GTP                        | Other               | chemical-endogenous mammalian |        |
| HHIP                       | Plasma Membrane     | Other                         | 64399  |
| IGF-1                      | Extracellular Space | growth factor                 | 3479   |
| Integrin                   | Plasma Membrane     | Complex                       |        |
| Intersectin                | Cytoplasm           | Other                         | 6453   |
| IP3                        | Other               | chemical-endogenous mammalian |        |
| ITGB1                      | Plasma Membrane     | transmembrane receptor        | 3688   |
| KALRN                      | Cytoplasm           | Kinase                        | 8997   |
| KLC1                       | Cytoplasm           | Other                         | 3831   |
| L1CAM                      | Plasma Membrane     | Other                         | 3897   |
| LIMK                       | Cytoplasm           | Group                         |        |
| LINGO1                     | Plasma Membrane     | Other                         | 84894  |
| MAG                        | Plasma Membrane     | Other                         | 4099   |
| MEK1/2                     | Cytoplasm           | Group                         |        |

|                   |                     |                        |       |
|-------------------|---------------------|------------------------|-------|
| MET               | Plasma Membrane     | Kinase                 | 4233  |
| Metalloproteinase | Extracellular Space | Group                  |       |
| MICAL             | Cytoplasm           | Enzyme                 | 64780 |
| MLC               | Cytoplasm           | Group                  |       |
| MNK1              | Cytoplasm           | Kinase                 | 8569  |
| NCK1              | Cytoplasm           | Kinase                 | 4690  |
| Netrin            | Extracellular Space | Group                  |       |
| Netrin G          | Extracellular Space | Other                  | 22854 |
| NFAT              | Cytoplasm           | Complex                |       |
| NGEF              | Cytoplasm           | Other                  | 25791 |
| NGF               | Extracellular Space | growth factor          | 4803  |
| NGFR              | Plasma Membrane     | transmembrane receptor | 4804  |
| NGL1              | Plasma Membrane     | Other                  | 57689 |
| NGR               | Plasma Membrane     | transmembrane receptor | 65078 |
| NOGO              | Cytoplasm           | Other                  | 57142 |
| NRP               | Plasma Membrane     | Group                  |       |
| Nrp-PlexinA       | Plasma Membrane     | Complex                |       |
| NT3/4             | Extracellular Space | Group                  |       |
| Ntrk dimer        | Plasma Membrane     | Complex                |       |
| PAK               | Cytoplasm           | Group                  |       |
| PDGF              | Extracellular Space | Complex                |       |
| PFN               | Cytoplasm           | Group                  |       |
| PI3K              | Cytoplasm           | Complex                |       |
| PI3K p110         | Cytoplasm           | Group                  |       |
| PI3K p85          | Cytoplasm           | Group                  |       |
| PKA               | Cytoplasm           | Complex                |       |
| PKC               | Cytoplasm           | Group                  |       |
| PLC               | Cytoplasm           | Group                  |       |
| Plexin A          | Plasma Membrane     | Group                  |       |
| Plexin B3         | Plasma Membrane     | transmembrane receptor | 5365  |
| Plexin C          | Plasma Membrane     | transmembrane receptor | 10154 |
| PLXNB1            | Plasma Membrane     | Group                  |       |
| PLXND1            | Plasma Membrane     | transmembrane receptor | 23129 |
| PLXND1            | Plasma Membrane     | Group                  |       |
| PXN               | Cytoplasm           | Other                  | 5829  |
| R-Ras             | Cytoplasm           | Enzyme                 | 6237  |
| RAC               | Cytoplasm           | group                  |       |
| RAP1              | Cytoplasm           | group                  |       |
| RAPL              | Plasma Membrane     | other                  | 83593 |
| Ras               | Cytoplasm           | group                  |       |
| RASGAP            | Cytoplasm           | transporter            | 5921  |
| RGS3              | Nucleus             | other                  | 5998  |
| RHOA              | Cytoplasm           | enzyme                 | 387   |
| RHOD              | Cytoplasm           | enzyme                 | 29984 |
| RND1              | Cytoplasm           | enzyme                 | 27289 |
| ROBO 1/2          | Plasma Membrane     | group                  |       |

|            |                     |                            |       |
|------------|---------------------|----------------------------|-------|
| ROBO 3     | Plasma Membrane     | transmembrane receptor     | 64221 |
| ROCK       | Cytoplasm           | group                      |       |
| SDC2       | Plasma Membrane     | other                      | 6383  |
| SDCBP      | Plasma Membrane     | enzyme                     | 6386  |
| SDF-1      | Extracellular Space | cytokine                   | 6387  |
| SEMA3      | Extracellular Space | group                      |       |
| SEMA4      | Plasma Membrane     | group                      |       |
| SEMA5A     | Plasma Membrane     | transmembrane receptor     | 9037  |
| SEMA6      | Plasma Membrane     | group                      |       |
| SEMA7A     | Plasma Membrane     | transmembrane receptor     | 8482  |
| Shank      | Plasma Membrane     | other                      | 22941 |
| SHC        | Cytoplasm           | other                      | 6464  |
| SHEP1      | Cytoplasm           | enzyme                     | 8924  |
| Shh        | Extracellular Space | peptidase                  | 6469  |
| SHP2       | Cytoplasm           | phosphatase                | 5781  |
| SLIT       | Extracellular Space | group                      |       |
| SMO        | Plasma Membrane     | G-protein coupled receptor | 6608  |
| SOS        | Cytoplasm           | group                      |       |
| srGAP      | Cytoplasm           | group                      |       |
| SUFU       | Nucleus             | transcription regulator    | 51684 |
| TRK        | Plasma Membrane     | group                      |       |
| Tubulin    | Cytoplasm           | complex                    |       |
| UNC5       | Plasma Membrane     | group                      |       |
| VASP       | Plasma Membrane     | other                      | 7408  |
| VEGF       | Extracellular Space | group                      |       |
| VSM-RHOGEF | Cytoplasm           | other                      | 22899 |
| WASP       | Cytoplasm           | group                      |       |
| Wnt        | Extracellular Space | group                      |       |
| Wnt5a      | Extracellular Space | cytokine                   | 7474  |

---

#### 4- Genes of Regulation of the Epithelial Mesenchymal Transition Pathway

| Symbol                      | Location            | Family                  | Gene ID for Human |
|-----------------------------|---------------------|-------------------------|-------------------|
| β-Catenin                   | Nucleus             | transcription regulator | 1499              |
| β-catenin-APC-AXIN-GSK3β    | Other               | complex                 |                   |
| β-catenin-BCL9-PYGO-TCF/LEF | Other               | complex                 |                   |
| γ-Secretase                 | Plasma Membrane     | complex                 |                   |
| AKT                         | Cytoplasm           | group                   |                   |
| APC                         | Nucleus             | enzyme                  | 324               |
| AXIN                        | Cytoplasm           | other                   | 8312              |
| BCL9                        | Nucleus             | other                   | 607               |
| c-Met                       | Plasma Membrane     | kinase                  | 4233              |
| Claudin-3                   | Plasma Membrane     | transmembrane receptor  | 1365              |
| CSL                         | Nucleus             | transcription regulator | 3516              |
| CSL-HIF1A-MAML1-NICD        | Other               | complex                 |                   |
| DVL                         | Cytoplasm           | group                   |                   |
| E-Cadherin                  | Plasma Membrane     | other                   | 999               |
| E2A                         | Nucleus             | transcription regulator | 6929              |
| EGF                         | Extracellular Space | growth factor           | 1950              |
| EGFR                        | Plasma Membrane     | kinase                  | 1956              |
| EGR1                        | Nucleus             | transcription regulator | 1958              |
| ERK1/2                      | Cytoplasm           | group                   |                   |
| ESRP                        | Nucleus             | other                   | 80004             |
| ETS1                        | Nucleus             | transcription regulator | 2113              |
| FGF                         | Extracellular Space | group                   |                   |
| FGF dimer                   | Other               | complex                 |                   |
| FGF18/20                    | Other               | group                   |                   |
| FGFR                        | Plasma Membrane     | group                   |                   |
| FOXC2                       | Nucleus             | transcription regulator | 2303              |
| Frizzled                    | Plasma Membrane     | group                   |                   |
| FRS2                        | Plasma Membrane     | kinase                  | 10818             |
| FRS2-GRB2-SHP2              | Other               | complex                 |                   |
| GAB1                        | Cytoplasm           | kinase                  | 2549              |
| GRB2                        | Cytoplasm           | kinase                  | 2885              |
| GSC                         | Nucleus             | transcription regulator | 145258            |
| GSK3β                       | Nucleus             | kinase                  | 2932              |
| HGF                         | Extracellular Space | growth factor           | 3082              |
| HIF1A                       | Nucleus             | transcription regulator | 3091              |
| HMGA2                       | Nucleus             | enzyme                  | 8091              |
| Hypoxia                     | Other               | disease                 |                   |
| ID2                         | Nucleus             | transcription regulator | 3398              |
| JAGGED-1/2                  | Other               | group                   |                   |
| JAK                         | Cytoplasm           | group                   |                   |
| LOX                         | Extracellular Space | enzyme                  | 4015              |
| MAML1                       | Nucleus             | transcription regulator | 9794              |



|               |                     |                         |                                        |
|---------------|---------------------|-------------------------|----------------------------------------|
| MEK           | Cytoplasm           | group                   |                                        |
| miR-155       | Cytoplasm           | microRNA                | 406947                                 |
| miR-192       | Cytoplasm           | microRNA                | 406997 406967                          |
| miR-200b      | Cytoplasm           | microRNA                | 406984 406933 406983 <br>554210 406985 |
| miR-34a       | Cytoplasm           | microRNA                | 407041 407040 407042                   |
| MMP-2         | Extracellular Space | peptidase               | 4313                                   |
| MMP-9         | Extracellular Space | peptidase               | 4318                                   |
| N-Cadherin    | Other               | group                   |                                        |
| NF-κB         | Nucleus             | complex                 |                                        |
| NOTCH         | Plasma Membrane     | transcription regulator | 4851                                   |
| NOTCH         | Plasma Membrane     | group                   |                                        |
| PAR6          | Other               | group                   |                                        |
| PDGF-D        | Extracellular Space | growth factor           | 80310                                  |
| PDGF-D dimer  | Extracellular Space | complex                 |                                        |
| PDGF-Rβ       | Plasma Membrane     | kinase                  | 5159                                   |
| PDGF-Rβ dimer | Other               | complex                 |                                        |
| PI3K          | Cytoplasm           | complex                 |                                        |
| PYGO          | Other               | group                   |                                        |
| Raf           | Cytoplasm           | group                   |                                        |
| Ras           | Cytoplasm           | group                   |                                        |
| RHOA          | Cytoplasm           | enzyme                  | 387                                    |
| SHP2          | Cytoplasm           | phosphatase             | 5781                                   |
| SIP1(ZEB2)    | Nucleus             | transcription regulator | 9839                                   |
| SMAD2/3       | Cytoplasm           | group                   |                                        |
| SMAD2/3-SMAD4 | Nucleus             | complex                 |                                        |
| SMAD4         | Nucleus             | transcription regulator | 4089                                   |
| SMURF1        | Cytoplasm           | enzyme                  | 57154                                  |
| SNAIL-1       | Nucleus             | transcription regulator | 6615                                   |
| SNAIL-2(SLUG) | Nucleus             | transcription regulator | 6591                                   |
| SOS           | Cytoplasm           | group                   |                                        |
| STAT3         | Nucleus             | transcription regulator | 6774                                   |
| TACE          | Plasma Membrane     | peptidase               | 6868                                   |
| TCF/LEF       | Nucleus             | group                   |                                        |
| TGFβRI        | Plasma Membrane     | kinase                  | 7046                                   |
| TGFβRII       | Plasma Membrane     | kinase                  | 7048                                   |
| TGF-β         | Extracellular Space | group                   |                                        |
| TWIST         | Other               | group                   |                                        |
| WNT           | Extracellular Space | group                   |                                        |
| ZEB           | Other               | group                   |                                        |
| ZEB1          | Nucleus             | transcription regulator | 6935                                   |

## 5- Genes of STAT3 Pathway

| Symbol           | Location            | Family                          | Gene ID for Human |
|------------------|---------------------|---------------------------------|-------------------|
| BCL2             | Cytoplasm           | transporter                     | 596               |
| CDC25A           | Nucleus             | phosphatase                     | 993               |
| CIS              | Cytoplasm           | other                           | 1154              |
| CytokineReceptor | Plasma Membrane     | group                           |                   |
| Cytokines        | Extracellular Space | group                           |                   |
| ERK1/2           | Cytoplasm           | group                           |                   |
| GF               | Extracellular Space | group                           |                   |
| GFReceptor       | Plasma Membrane     | group                           |                   |
| GRIM-19          | Cytoplasm           | enzyme                          | 51079             |
| GTP              | Other               | chemical - endogenous mammalian |                   |
| JAK2             | Cytoplasm           | kinase                          | 3717              |
| JNK              | Cytoplasm           | group                           |                   |
| MKK1/2           | Cytoplasm           | group                           |                   |
| MKKs             | Other               | group                           |                   |
| MLKs             | Other               | group                           |                   |
| MYC              | Nucleus             | transcription regulator         | 4609              |
| p21WAF1          | Nucleus             | kinase                          | 1026              |
| p38              | Cytoplasm           | group                           |                   |
| PIAS3            | Nucleus             | transcription regulator         | 10401             |
| PIM1             | Cytoplasm           | kinase                          | 5292              |
| PTP              | Cytoplasm           | phosphatase                     | 5771              |
| RAC1             | Plasma Membrane     | enzyme                          | 5879              |
| RAF1             | Cytoplasm           | kinase                          | 5894              |
| RAS              | Cytoplasm           | group                           |                   |
| SHP1             | Cytoplasm           | phosphatase                     | 5777              |
| SOCS             | Cytoplasm           | group                           |                   |
| SRC              | Cytoplasm           | kinase                          | 6714              |
| STAT3            | Nucleus             | transcription regulator         | 6774              |
| STAT3 dimer      | Nucleus             | complex                         |                   |
| Tumor Metastasis | Other               | disease                         |                   |
| TYK2             | Plasma Membrane     | kinase                          | 7297              |

## 6- Genes of Adipogenesis Pathway

| Symbol          | Location            | Family                   | Gene ID for Human |
|-----------------|---------------------|--------------------------|-------------------|
| $\beta$ catenin | Nucleus             | transcription regulator  | 1499              |
| AGPAT2          | Cytoplasm           | enzyme                   | 10555             |
| AKT             | Cytoplasm           | kinase                   | 207               |
| ATG5            | Cytoplasm           | other                    | 9474              |
| ATG7            | Cytoplasm           | enzyme                   | 10533             |
| BMAL1/CLOCK     | Nucleus             | complex                  |                   |
| BMP2/4/7        | Extracellular Space | group                    |                   |
| BMPR            | Plasma Membrane     | complex                  |                   |
| BSCL2           | Cytoplasm           | other                    | 26580             |
| C/EBP $\alpha$  | Nucleus             | transcription regulator  | 1050              |
| C/EBP $\beta$   | Nucleus             | transcription regulator  | 1051              |
| C/EBP $\delta$  | Nucleus             | transcription regulator  | 1052              |
| CDK5            | Nucleus             | kinase                   | 1020              |
| CDK7            | Nucleus             | kinase                   | 1022              |
| CHOP-10         | Nucleus             | transcription regulator  | 1649              |
|                 |                     | ligand-dependent nuclear |                   |
| COUP-TFII       | Nucleus             | receptor                 | 7026              |
| CTBP1/2         | Nucleus             | group                    |                   |
| DGK $\delta$    | Cytoplasm           | kinase                   | 8527              |
| EBF1            | Nucleus             | transcription regulator  | 1879              |
| EGR2            | Nucleus             | transcription regulator  | 1959              |
| ETO             | Nucleus             | transcription regulator  | 862               |
| EZH2            | Nucleus             | transcription regulator  | 2146              |
| FABP4           | Cytoplasm           | transporter              | 2167              |
| FBXW7           | Nucleus             | enzyme                   | 55294             |
| FGF-1           | Extracellular Space | growth factor            | 2246              |
| FGF-2           | Extracellular Space | growth factor            | 2247              |
| FGFR            | Plasma Membrane     | group                    |                   |
| FOXC2           | Nucleus             | transcription regulator  | 2303              |
| FOXO1           | Nucleus             | transcription regulator  | 2308              |
| FZD             | Plasma Membrane     | group                    |                   |
| GLUT4           | Plasma Membrane     | transporter              | 6517              |
| HAT             | Nucleus             | complex                  |                   |
| HDAC            | Other               | complex                  |                   |
| HIF1A           | Nucleus             | transcription regulator  | 3091              |
| IP6K            | Nucleus             | phosphatase              | 9677              |
| KLF3            | Nucleus             | transcription regulator  | 51274             |
| KLF5            | Nucleus             | transcription regulator  | 688               |
| LEP             | Extracellular Space | growth factor            | 3952              |
| lipidsynthesis  | Other               | function                 |                   |

|                  |                     |                                   |        |
|------------------|---------------------|-----------------------------------|--------|
| LPIN1            | Nucleus             | phosphatase                       | 23175  |
| LPL              | Cytoplasm           | enzyme                            | 4023   |
| LSD1             | Nucleus             | enzyme                            | 23028  |
| miR-31           | Cytoplasm           | microRNA                          | 407035 |
| miR-326          | Cytoplasm           | microRNA                          | 442900 |
| MiR-448          | Cytoplasm           | microRNA                          | 554212 |
| miR155           | Cytoplasm           | microRNA                          | 406947 |
| MLL4             | Nucleus             | transcription regulator           | 9757   |
| MNAT1            | Nucleus             | other                             | 4331   |
| NFATC4           | Nucleus             | transcription regulator           | 4776   |
| NOC              | Nucleus             | transcription regulator           | 25819  |
| p53              | Nucleus             | transcription regulator           | 7157   |
| PER2             | Nucleus             | transcription regulator           | 8864   |
| PLIN1            | Cytoplasm           | other                             | 5346   |
| PPAR $\gamma$    | Nucleus             | ligand-dependent nuclear receptor | 5468   |
| PREF1            | Extracellular Space | other                             | 8788   |
| PTIP $\beta$     | Nucleus             | other                             | 22976  |
| RB               | Nucleus             | transcription regulator           | 5925   |
| RBP1             | Extracellular Space | transporter                       | 5947   |
| Rev-ERB $\alpha$ | Nucleus             | ligand-dependent nuclear receptor | 9975   |
| S6K1             | Other               | group                             |        |
| SENP2            | Nucleus             | peptidase                         | 59343  |
| SETDB1           | Nucleus             | enzyme                            | 9869   |
| SIRT1            | Nucleus             | transcription regulator           | 23411  |
| SIRT2            | Nucleus             | transcription regulator           | 22933  |
| SMAD1/5/8        | Cytoplasm           | group                             |        |
| SMAD3            | Nucleus             | transcription regulator           | 4088   |
| SOX9             | Nucleus             | transcription regulator           | 6662   |
| SREBP1           | Nucleus             | transcription regulator           | 6720   |
| STAT5            | Nucleus             | transcription regulator           | 6777   |
| TCF7             | Nucleus             | transcription regulator           | 6932   |
| TFIIH            | Nucleus             | complex                           |        |
| TGF $\beta$      | Extracellular Space | growth factor                     | 7040   |
| TNF $\alpha$     | Extracellular Space | cytokine                          | 7124   |
| TNFR1            | Plasma Membrane     | transmembrane receptor            | 7132   |
| TXNIP            | Cytoplasm           | other                             | 10628  |
| WNT10b           | Extracellular Space | other                             | 7480   |
| WNT5a            | Extracellular Space | cytokine                          | 7474   |
| XBP1             | Nucleus             | transcription regulator           | 7494   |
| ZFP423           | Nucleus             | transcription regulator           | 23090  |

---

## 7- Genes of Glucocorticoid Receptor Signaling Pathway

| Symbol           | Location            | Family                            | Gene ID for Human |
|------------------|---------------------|-----------------------------------|-------------------|
| 14-3-3η          | Cytoplasm           | transcription regulator           | 7533              |
| A2M              | Extracellular Space | transporter                       | 2                 |
| ADRB2            | Plasma Membrane     | G-protein coupled receptor        | 154               |
| AGT              | Extracellular Space | growth factor                     | 183               |
| AKT              | Cytoplasm           | group                             |                   |
| Aldosterone      | Other               | chemical - endogenous mammalian   |                   |
| Aldosterone-MR   | Cytoplasm           | complex                           |                   |
| AMPK             | Cytoplasm           | complex                           |                   |
| ANF              | Extracellular Space | other                             | 4878              |
| Ap-1             | Nucleus             | complex                           |                   |
| AR               | Nucleus             | ligand-dependent nuclear receptor | 367               |
| BAG1             | Cytoplasm           | other                             | 573               |
| BCL-2            | Cytoplasm           | transporter                       | 596               |
| BCL-XL           | Cytoplasm           | other                             | 598               |
| BGLAP            | Extracellular Space | other                             | 632               |
| c-Fos            | Nucleus             | transcription regulator           | 2353              |
| c-Jun            | Nucleus             | transcription regulator           | 3725              |
| c-Raf            | Cytoplasm           | kinase                            | 5894              |
| Ca <sup>2+</sup> | Other               | chemical - endogenous mammalian   |                   |
| Calcineurin      | Cytoplasm           | complex                           |                   |
| CBP              | Nucleus             | transcription regulator           | 1387              |
| CC10             | Extracellular Space | cytokine                          | 7356              |
| CCL11            | Extracellular Space | cytokine                          | 6356              |
| CCL13            | Extracellular Space | cytokine                          | 6357              |
| CCL2             | Extracellular Space | cytokine                          | 6347              |
| CCL3             | Extracellular Space | cytokine                          | 6348              |
| CCL5             | Extracellular Space | cytokine                          | 6352              |
| CD163            | Plasma Membrane     | transmembrane receptor            | 9332              |
| CEBPα            | Nucleus             | transcription regulator           | 1050              |
| CEBPβ            | Nucleus             | transcription regulator           | 1051              |
| COX2             | Cytoplasm           | enzyme                            | 5743              |
| CREB             | Nucleus             | transcription regulator           | 1385              |
| CSF2             | Extracellular Space | cytokine                          | 1437              |
| CSN2             | Extracellular Space | kinase                            | 1447              |
| CXCL2            | Extracellular Space | cytokine                          | 2921              |
| DRIP150          | Nucleus             | transcription regulator           | 9282              |
| DRIP205          | Nucleus             | transcription regulator           | 5469              |
| Dynein           | Cytoplasm           | complex                           |                   |
| Elk-1            | Nucleus             | transcription regulator           | 2002              |
| ER               | Nucleus             | ligand-dependent nuclear receptor | 2099              |
| ERK1/2           | Cytoplasm           | group                             |                   |
| Estrogen-ER      | Nucleus             | complex                           |                   |

|                     |                     |                                   |       |
|---------------------|---------------------|-----------------------------------|-------|
| FCGR1               | Plasma Membrane     | transmembrane receptor            | 2209  |
| FGG                 | Extracellular Space | other                             | 2266  |
| FKBP51              | Nucleus             | enzyme                            | 2289  |
| FKBP52              | Nucleus             | enzyme                            | 2288  |
| FOXO3A              | Nucleus             | transcription regulator           | 2309  |
| GC-GCR dimer        | Nucleus             | complex                           |       |
| GILZ                | Nucleus             | transcription regulator           | 1831  |
| GR                  | Nucleus             | ligand-dependent nuclear receptor | 2908  |
| GRB2                | Cytoplasm           | kinase                            | 2885  |
| HMG-1               | Nucleus             | transcription regulator           | 3146  |
| HSP70               | Cytoplasm           | group                             |       |
| HSP90               | Cytoplasm           | group                             |       |
| IκB                 | Cytoplasm           | group                             |       |
| IκBα                | Cytoplasm           | transcription regulator           | 4792  |
| ICAM1               | Plasma Membrane     | transmembrane receptor            | 3383  |
| IFN-γ               | Extracellular Space | cytokine                          | 3458  |
| Ikb-Rela-Nfkb1-Pkac | Cytoplasm           | complex                           |       |
| IKK                 | Cytoplasm           | complex                           |       |
| IL-1β               | Extracellular Space | cytokine                          | 3553  |
| IL-10               | Extracellular Space | cytokine                          | 3586  |
| IL-13               | Extracellular Space | cytokine                          | 3596  |
| IL-2                | Extracellular Space | cytokine                          | 3558  |
| IL-3                | Extracellular Space | cytokine                          | 3562  |
| IL-4                | Extracellular Space | cytokine                          | 3565  |
| IL-5                | Extracellular Space | cytokine                          | 3567  |
| IL-6                | Extracellular Space | cytokine                          | 3569  |
| IL-8                | Extracellular Space | cytokine                          | 3576  |
| IL1R2               | Plasma Membrane     | transmembrane receptor            | 7850  |
| IL1RA               | Extracellular Space | cytokine                          | 3557  |
| iNOS                | Cytoplasm           | enzyme                            | 4843  |
| JAK1                | Cytoplasm           | kinase                            | 3716  |
| JAK2                | Cytoplasm           | kinase                            | 3717  |
| JAK3                | Cytoplasm           | kinase                            | 3718  |
| JNK                 | Cytoplasm           | group                             |       |
| Keratin             | Nucleus             | group                             |       |
| Lipocortin          | Plasma Membrane     | enzyme                            | 301   |
| MEK1/2              | Cytoplasm           | group                             |       |
| MEKK1               | Cytoplasm           | kinase                            | 4214  |
| MKK4/7              | Cytoplasm           | group                             |       |
| MKP-1               | Nucleus             | phosphatase                       | 1843  |
| MMP1                | Extracellular Space | peptidase                         | 4312  |
| MR                  | Nucleus             | ligand-dependent nuclear receptor | 4306  |
| NCOA2               | Nucleus             | transcription regulator           | 10499 |
| NCOA3               | Nucleus             | transcription regulator           | 8202  |
| NCOR                | Nucleus             | group                             |       |
| NF-κB1 p50          | Nucleus             | transcription regulator           | 4790  |

|                                  |                     |                                   |       |
|----------------------------------|---------------------|-----------------------------------|-------|
| NFAT                             | Cytoplasm           | group                             |       |
| NfkB-RelA                        | Nucleus             | complex                           |       |
| NIK                              | Cytoplasm           | kinase                            | 9020  |
| OCT1/2                           | Nucleus             | group                             |       |
| p21Cip1                          | Nucleus             | kinase                            | 1026  |
| p300                             | Nucleus             | transcription regulator           | 2033  |
| p38 MAPK                         | Cytoplasm           | group                             |       |
| p57Kip2                          | Nucleus             | other                             | 1028  |
| p65/RelA                         | Nucleus             | transcription regulator           | 5970  |
| PAI-1                            | Extracellular Space | other                             | 5054  |
| PBX                              | Nucleus             | transcription regulator           | 5087  |
| PCAF                             | Nucleus             | transcription regulator           | 8850  |
| PEPCK                            | Nucleus             | group                             |       |
| PGR                              | Nucleus             | ligand-dependent nuclear receptor | 5241  |
| PI3K                             | Cytoplasm           | complex                           |       |
| PKAc                             | Cytoplasm           | group                             |       |
| POMC                             | Extracellular Space | other                             | 5443  |
| PRL                              | Extracellular Space | cytokine                          | 5617  |
| Rac1                             | Plasma Membrane     | enzyme                            | 5879  |
| Ras                              | Cytoplasm           | group                             |       |
| RIP140                           | Nucleus             | transcription regulator           | 8204  |
| RNAPol II                        | Nucleus             | complex                           |       |
| RNA pol II-Transcription factors | Nucleus             | complex                           |       |
| SELE                             | Plasma Membrane     | transmembrane receptor            | 6401  |
| SGK1                             | Cytoplasm           | kinase                            | 6446  |
| SHC                              | Cytoplasm           | other                             | 6464  |
| SLPI                             | Cytoplasm           | other                             | 6590  |
| SMAD2/3                          | Cytoplasm           | group                             |       |
| Smad2/3-Smad4                    | Nucleus             | complex                           |       |
| SMAD4                            | Nucleus             | transcription regulator           | 4089  |
| SMILE                            | Nucleus             | transcription regulator           | 58487 |
| SOS                              | Cytoplasm           | group                             |       |
| SRA1                             | Nucleus             | transcription regulator           | 10011 |
| SRC-1                            | Nucleus             | transcription regulator           | 8648  |
| STAT1                            | Nucleus             | transcription regulator           | 6772  |
| Stat1 dimer                      | Nucleus             | complex                           |       |
| STAT3                            | Nucleus             | transcription regulator           | 6774  |
| Stat3 dimer                      | Nucleus             | complex                           |       |
| STAT5                            | Cytoplasm           | group                             |       |
| Stat5 dimer                      | Nucleus             | complex                           |       |
| SUMO1                            | Nucleus             | enzyme                            | 7341  |
| SWI/SNF                          | Nucleus             | complex                           |       |
| TAB1                             | Cytoplasm           | enzyme                            | 10454 |
| TAF                              | Nucleus             | complex                           |       |
| TAK1                             | Cytoplasm           | kinase                            | 6885  |

|                   |                     |                            |       |
|-------------------|---------------------|----------------------------|-------|
| TAT               | Cytoplasm           | enzyme                     | 6898  |
| TBP               | Nucleus             | transcription regulator    | 6908  |
| TCR $\alpha$      | Plasma Membrane     | transmembrane receptor     | 6955  |
| TCR $\beta$       | Plasma Membrane     | transmembrane receptor     | 6957  |
| TEBP              | Cytoplasm           | enzyme                     | 10728 |
| TFIIA             | Nucleus             | complex                    |       |
| TFIIB             | Nucleus             | transcription regulator    | 2959  |
| TFIIE             | Nucleus             | complex                    |       |
| TFIIF             | Nucleus             | complex                    |       |
| TFIIH             | Nucleus             | complex                    |       |
| Tgf beta receptor | Plasma Membrane     | complex                    |       |
| TGF- $\beta$      | Extracellular Space | group                      |       |
| TGFBR1            | Plasma Membrane     | kinase                     | 7046  |
| TGFBR2            | Plasma Membrane     | kinase                     | 7048  |
| TNF $\alpha$      | Extracellular Space | cytokine                   | 7124  |
| TRAF2             | Cytoplasm           | enzyme                     | 7186  |
| TRAF6             | Cytoplasm           | enzyme                     | 7189  |
| TSG101            | Cytoplasm           | transcription regulator    | 7251  |
| UBC9              | Nucleus             | enzyme                     | 7329  |
| uPA               | Extracellular Space | peptidase                  | 5328  |
| VCAM1             | Plasma Membrane     | transmembrane receptor     | 7412  |
| VIPR1             | Plasma Membrane     | G-protein coupled receptor | 7433  |

---



## 8- Genes of Beta Cell Receptor Signaling Pathway

| Symbol             | Location            | Family                  | Gene ID for Human |
|--------------------|---------------------|-------------------------|-------------------|
| ABL1               | Nucleus             | kinase                  | 25                |
| AKT                | Cytoplasm           | group                   |                   |
| APBB1IP            | Cytoplasm           | other                   | 54518             |
| ATF-2              | Nucleus             | transcription regulator | 1386              |
| BAD                | Cytoplasm           | other                   | 572               |
| BAM32              | Cytoplasm           | other                   | 27071             |
| BCAP               | Cytoplasm           | kinase                  | 118788            |
| BCL-10             | Cytoplasm           | transcription regulator | 8915              |
| BCL-6              | Nucleus             | transcription regulator | 604               |
| BCL-XL             | Cytoplasm           | other                   | 598               |
| Bcl10-Card10-Malt1 | Cytoplasm           | complex                 |                   |
| BCR                | Plasma Membrane     | complex                 |                   |
| BFL-1              | Cytoplasm           | other                   | 597               |
| BLNK               | Cytoplasm           | other                   | 29760             |
| BTK                | Cytoplasm           | kinase                  | 695               |
| c-Jun              | Nucleus             | transcription regulator | 3725              |
| c-RAF              | Cytoplasm           | kinase                  | 5894              |
| CaM                | Cytoplasm           | group                   |                   |
| CaMKII             | Cytoplasm           | complex                 |                   |
| CARD11             | Cytoplasm           | other                   | 29775             |
| CD19               | Plasma Membrane     | transmembrane receptor  | 930               |
| CD22               | Plasma Membrane     | transmembrane receptor  | 933               |
| CD45               | Plasma Membrane     | phosphatase             | 5788              |
| CD79A              | Plasma Membrane     | transmembrane receptor  | 973               |
| CD79B              | Plasma Membrane     | transmembrane receptor  | 974               |
| Cofilin            | Cytoplasm           | group                   |                   |
| CREB               | Nucleus             | group                   |                   |
| CSK                | Cytoplasm           | kinase                  | 1445              |
| EBF1               | Nucleus             | transcription regulator | 1879              |
| EBF1-FOXO1-TCF3    | Nucleus             | complex                 |                   |
| EGR-1              | Nucleus             | transcription regulator | 1958              |
| ELK-1              | Nucleus             | transcription regulator | 2002              |
| ERK1/2             | Cytoplasm           | group                   |                   |
| ETS-1              | Nucleus             | transcription regulator | 2113              |
| FAK                | Cytoplasm           | group                   |                   |
| FC $\gamma$ RII    | Plasma Membrane     | group                   |                   |
| FOXO1              | Nucleus             | transcription regulator | 2308              |
| GAB1/2             | Cytoplasm           | group                   |                   |
| GRB2               | Cytoplasm           | kinase                  | 2885              |
| GSK3               | Cytoplasm           | group                   |                   |
| I $\kappa$ B       | Cytoplasm           | group                   |                   |
| IGG                | Extracellular Space | complex                 |                   |

|           |                 |                         |       |
|-----------|-----------------|-------------------------|-------|
| IκB-NfκB  | Cytoplasm       | complex                 |       |
| IKK       | Cytoplasm       | complex                 |       |
| JNK1/2    | Cytoplasm       | group                   |       |
| LYN       | Cytoplasm       | kinase                  | 4067  |
| MALT1     | Cytoplasm       | peptidase               | 10892 |
| MEF2C     | Nucleus         | transcription regulator | 4208  |
| MEK1/2    | Cytoplasm       | group                   |       |
| MEKK      | Cytoplasm       | group                   |       |
| MKK3/4/6  | Cytoplasm       | group                   |       |
| MKK4/7    | Cytoplasm       | group                   |       |
| mTOR      | Nucleus         | kinase                  | 2475  |
| NF-κB     | Nucleus         | complex                 |       |
| NFAT      | Cytoplasm       | complex                 |       |
| OCT-2     | Nucleus         | transcription regulator | 5452  |
| p38 MAPK  | Cytoplasm       | group                   |       |
| p70S6K    | Cytoplasm       | group                   |       |
| PAG       | Plasma Membrane | other                   | 55824 |
| PAX5      | Nucleus         | transcription regulator | 5079  |
| PDK1      | Cytoplasm       | kinase                  | 5170  |
| PI3K      | Cytoplasm       | complex                 |       |
| PKC(β,θ)  | Cytoplasm       | group                   |       |
| PLCγ2     | Cytoplasm       | enzyme                  | 5336  |
| PP2B      | Cytoplasm       | complex                 |       |
| PTEN      | Cytoplasm       | phosphatase             | 5728  |
| PTK2B     | Cytoplasm       | kinase                  | 2185  |
| RAC/CDC42 | Cytoplasm       | group                   |       |
| RAP       | Cytoplasm       | group                   |       |
| RAS       | Cytoplasm       | group                   |       |
| RASSF5    | Plasma Membrane | other                   | 83593 |
| SHC       | Cytoplasm       | other                   | 6464  |
| SHIP      | Cytoplasm       | group                   |       |
| SHP1      | Cytoplasm       | phosphatase             | 5777  |
| SHP2      | Cytoplasm       | phosphatase             | 5781  |
| SOS       | Cytoplasm       | group                   |       |
| Syk       | Cytoplasm       | kinase                  | 6850  |
| TCF3      | Nucleus         | transcription regulator | 6929  |
| VAV       | Cytoplasm       | group                   |       |

---

## 9- Genes of PTEN (Phosphatase and tensin homolog) Signaling Pathway

| Symbol             | Location            | Family                  | Gene ID for Human |
|--------------------|---------------------|-------------------------|-------------------|
| 14-3-3 $\eta$      | Cytoplasm           | transcription regulator | 7533              |
| AKT                | Cytoplasm           | group                   |                   |
| BAD                | Cytoplasm           | other                   | 572               |
| BCL-2              | Cytoplasm           | transporter             | 596               |
| BCL-XL             | Cytoplasm           | other                   | 598               |
| BIM                | Cytoplasm           | other                   | 10018             |
| c-Raf              | Cytoplasm           | kinase                  | 5894              |
| CAS                | Plasma Membrane     | enzyme                  | 9564              |
| CASP3              | Cytoplasm           | peptidase               | 836               |
| CASP9              | Cytoplasm           | peptidase               | 842               |
| CBL                | Nucleus             | transcription regulator | 867               |
| CDC42              | Cytoplasm           | enzyme                  | 998               |
| CK2                | Cytoplasm           | complex                 |                   |
| CyclinD1           | Nucleus             | transcription regulator | 595               |
| ERK1/2             | Cytoplasm           | group                   |                   |
| FAK                | Cytoplasm           | kinase                  | 5747              |
| FASL               | Extracellular Space | cytokine                | 356               |
| FOXO               | Cytoplasm           | group                   |                   |
| GFR                | Plasma Membrane     | group                   |                   |
| GRB2               | Cytoplasm           | kinase                  | 2885              |
| GSK3               | Cytoplasm           | group                   |                   |
| IKK                | Cytoplasm           | complex                 |                   |
| ILK                | Plasma Membrane     | kinase                  | 3611              |
| Integrin           | Plasma Membrane     | complex                 |                   |
| MAGI               | Cytoplasm           | group                   |                   |
| Magi-Pten          | Cytoplasm           | complex                 |                   |
| MAST2              | Cytoplasm           | kinase                  | 23139             |
| MEK1/2             | Cytoplasm           | group                   |                   |
| MSP58              | Nucleus             | other                   | 10445             |
| NF- $\kappa$ B     | Nucleus             | complex                 |                   |
| p21CIP1            | Nucleus             | kinase                  | 1026              |
| p27KIP1            | Nucleus             | kinase                  | 1027              |
| p70 S6K            | Cytoplasm           | group                   |                   |
| PDK1               | Cytoplasm           | kinase                  | 5170              |
| PI3K p101          | Cytoplasm           | kinase                  | 23533             |
| PI3K p110 $\gamma$ | Cytoplasm           | kinase                  | 5294              |
| PI3K p110          | Cytoplasm           | group                   |                   |
| PI3K p85           | Cytoplasm           | group                   |                   |
| PKC $\zeta$        | Cytoplasm           | kinase                  | 5590              |
| PREX2              | Cytoplasm           | other                   | 80243             |
| PTEN               | Cytoplasm           | phosphatase             | 5728              |
| RAC                | Cytoplasm           | group                   |                   |

|       |                 |       |       |
|-------|-----------------|-------|-------|
| Ras   | Cytoplasm       | group |       |
| SHC   | Cytoplasm       | other | 6464  |
| SHIP  | Cytoplasm       | group |       |
| SIPL1 | Plasma Membrane | other | 81858 |
| SOS   | Cytoplasm       | group |       |

---
